# Supplementary material for: Conformational Sampling Deciphers the Chameleonic Properties of a VHL-Based Degrader
Source: MDPI journal article supplement (doi:10.3390/pharmaceutics15010272), 2023-01-12
Supplement: s1 [file s1]

Supplementary Materials

# Conformational Sampling Deciphers the Chameleonic Properties of a VHL-Based Degraders

Giuseppe Ermondi <sup>1</sup>, Diego Garcia Jimenez <sup>1</sup>, Matteo Rossi Sebastiano <sup>1</sup>, Jan Kihlberg <sup>2</sup> and Giulia Caron <sup>1,\*</sup>

<sup>1</sup> Department of Molecular Biotechnology and Health Sciences, University of Torino, Quareello 15, 10135 Torino, Italy

<sup>2</sup> Department of Chemistry—BMC, Uppsala University, SE-75123 Uppsala, Sweden

\* Correspondence: giulia.caron@unito.it; Tel.: +39-0116708337

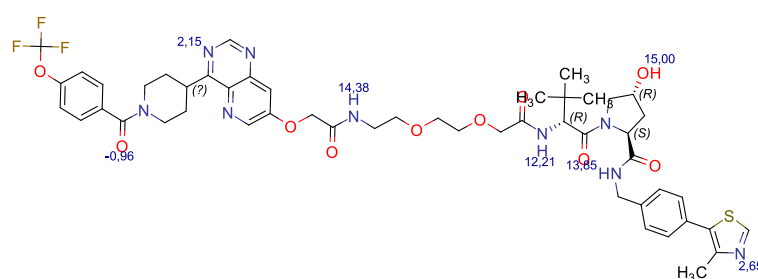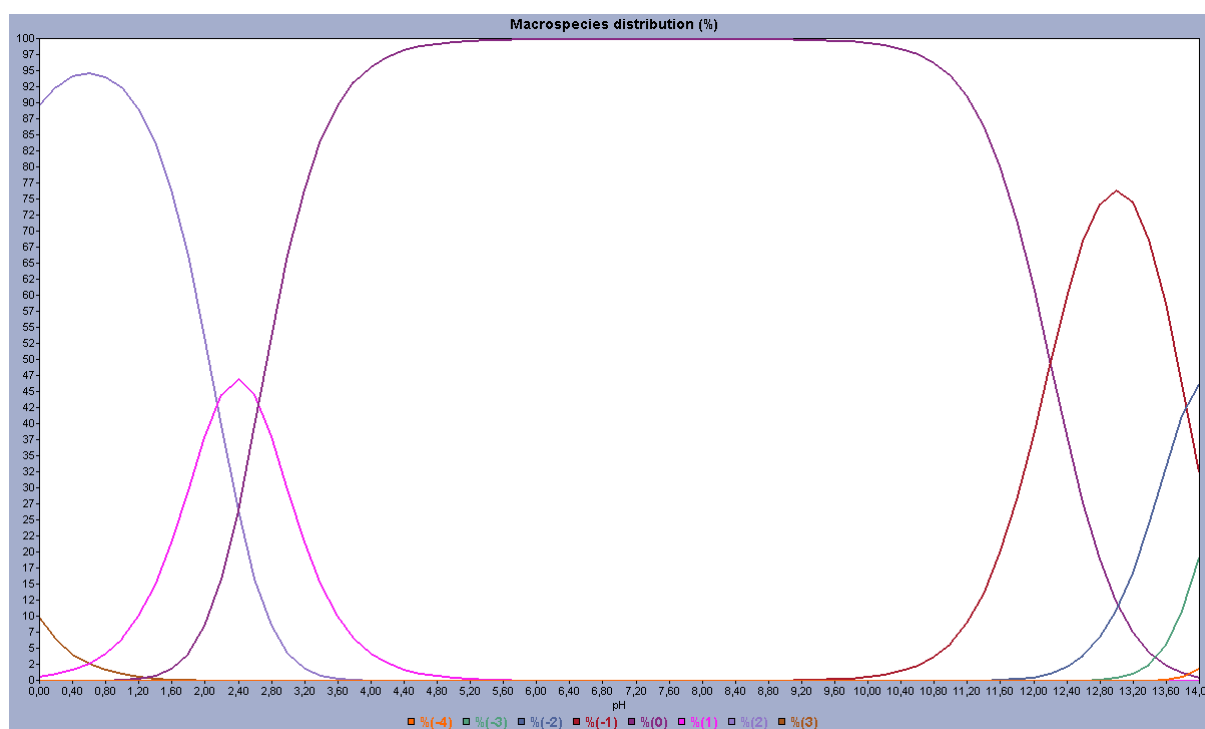

**Figure S1.** Predicted ionization profile and pKa values of PROTAC-1. ChemAxon tool was used.

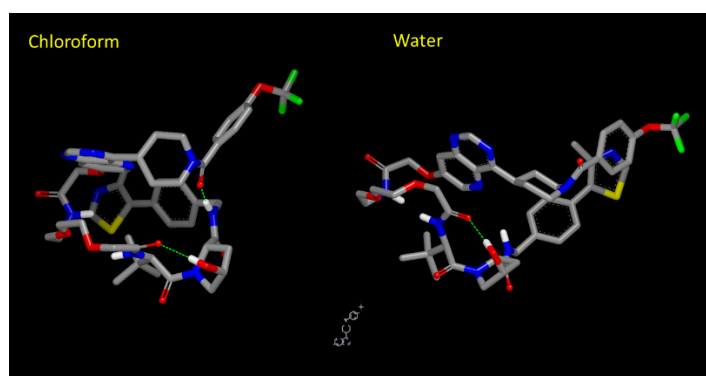

Figure S2. Comparison of the IMHBs pattern in the two solvents from Sc05.

Table S1. 2D descriptors calculated for PROTAC-1. In red Ro5 violations.

| MW      | RBN | PHI   | nHDon | nHAcc | TPSA(Tot) |
|---------|-----|-------|-------|-------|-----------|
| 1034.12 | 21  | 19.04 | 4     | 22    | 264.87    |

Table S2. Summary of the data resulting from the conformational sampling protocols used.

|                                        | Sc01  |                   | Sc02  |                   | Sc03  |                   | Sc04   |                   | Sc05   |                   | Sc06   |                   |
|----------------------------------------|-------|-------------------|-------|-------------------|-------|-------------------|--------|-------------------|--------|-------------------|--------|-------------------|
|                                        | water | CHCl <sub>3</sub> | water | CHCl <sub>3</sub> | water | CHCl <sub>3</sub> | water  | CHCl <sub>3</sub> | water  | CHCl <sub>3</sub> | water  | CHCl <sub>3</sub> |
| nConf                                  | 181   | 99                | 275   | 90                | 275   | 90                | 114    | 123               | 331    | 174               | 331    | 174               |
| Rgyr                                   |       |                   |       |                   |       |                   |        |                   |        |                   |        |                   |
| Min                                    | 5.25  | 5.23              | 5.17  | 5.33              | 5.17  | 5.33              | 5.27   | 5.29              | 5.15   | 5.17              | 5.15   | 5.17              |
| Max                                    | 6.69  | 7.01              | 6.84  | 6.3               | 6.84  | 6.3               | 6.44   | 6.99              | 6.83   | 6.35              | 6.83   | 6.35              |
| Mean                                   | 5.78  | 5.79              | 5.79  | 5.96              | 5.79  | 5.96              | 5.73   | 6.13              | 5.76   | 5.6               | 5.76   | 5.6               |
| Median                                 | 5.76  | 5.82              | 5.61  | 5.98              | 5.61  | 5.98              | 5.6    | 6.19              | 5.62   | 5.51              | 5.62   | 5.51              |
| StdDev                                 | 0.23  | 0.26              | 0.46  | 0.16              | 0.46  | 0.16              | 0.36   | 0.36              | 0.4    | 0.27              | 0.4    | 0.27              |
| Δ (Max water - Min CHCl <sub>3</sub> ) | 1.46  |                   | 1.51  |                   | 1.51  |                   | 1.15   |                   | 1.66   |                   | 1.66   |                   |
| 3D PSA                                 |       |                   |       |                   |       |                   |        |                   |        |                   |        |                   |
| Min                                    | 238.7 | 224.7             | 238   | 223.2             | 238   | 223.2             | 241.2  | 233.4             | 235.2  | 230.4             | 235.2  | 230.4             |
| Max                                    | 258.7 | 242.6             | 254.6 | 237               | 254.6 | 237               | 254.7  | 250.8             | 257    | 250.7             | 257    | 250.7             |
| Mean                                   | 249.3 | 235.1             | 248.1 | 227.8             | 248.1 | 227.8             | 249.6  | 240.8             | 246.2  | 236.2             | 246.2  | 236.2             |
| Median                                 | 248.9 | 235.1             | 248   | 227.1             | 248   | 227.06            | 249.82 | 239.74            | 247.14 | 236.03            | 247.14 | 236               |
| StdDev                                 | 3.41  | 3.68              | 2.91  | 3.08              | 2.91  | 3.08              | 2.44   | 3.7               | 4.53   | 3.09              | 4.53   | 3.09              |
| Δ (Max water - Min CHCl <sub>3</sub> ) | 34    |                   | 31.4  |                   | 31.4  |                   | 21.3   |                   | 26.6   |                   | 26.6   |                   |
| IMHBs                                  |       |                   |       |                   |       |                   |        |                   |        |                   |        |                   |
| Min                                    | 0     | 1                 | 0     | 2                 | 0     | 2                 | 0      | 0                 | 0      | 1                 | 0      | 1                 |
| Max                                    | 3     | 4                 | 3     | 4                 | 3     | 4                 | 2      | 2                 | 2      | 2                 | 2      | 2                 |
| Mean                                   | 0.97  | 2.44              | 1.05  | 3.13              | 1.05  | 3.13              | 0.53   | 1.2               | 1.11   | 1.93              | 1.11   | 1.93              |
| Median                                 | 1     | 2                 | 1     | 3                 | 1     | 3                 | 1      | 1                 | 1      | 2                 | 1      | 2                 |
| StDev                                  | 0.65  | 0.67              | 0.48  | 0.56              | 0.48  | 0.56              | 0.53   | 0.47              | 0.54   | 0.26              | 0.54   | 0.26              |
| Δ (Max CHCl <sub>3</sub> - Min water)  | 4     |                   | 4     |                   | 4     |                   | 2      |                   | 2      |                   | 2      |                   |

Table S3. Summary of the data resulting from the post minimization performed with MOPAC.

| MO01                                   |  |                   |
|----------------------------------------|--|-------------------|
| Starting ensemble                      |  | Sc01              |
| Solvent                                |  | water             |
| nConf                                  |  | CHCl <sub>3</sub> |
|                                        |  | 100               |
|                                        |  | 80                |
| Rgyr                                   |  |                   |
| Min                                    |  | 5.03              |
| Max                                    |  | 5.9               |
| σ                                      |  | 0.87              |
| Mean                                   |  | 5.37              |
| Median                                 |  | 5.3               |
| StdDev                                 |  | 0.22              |
| Δ (Max water - Min CHCl <sub>3</sub> ) |  | 0.76              |

| 3D PSA                                        |       |       |  |
|-----------------------------------------------|-------|-------|--|
| Min                                           | 220.8 | 207.9 |  |
| Max                                           | 241   | 232.3 |  |
| ✱                                             | 20.22 | 24.42 |  |
| Mean                                          | 231.2 | 221.4 |  |
| Median                                        | 230.8 | 221.4 |  |
| StdDev                                        | 4.6   | 5.8   |  |
| $\Delta$ (Max water - Min CHCl <sub>3</sub> ) |       | 33.1  |  |
| IMHBs                                         |       |       |  |
| Min                                           | 1     | 1     |  |
| Max                                           | 3     | 3     |  |
| Mean                                          | 1.6   | 2.28  |  |
| Median                                        | 2     | 2     |  |
| StdDev                                        | 0.62  | 0.72  |  |
| $\Delta$ (Max CHCl <sub>3</sub> - Min water)  |       | 2     |  |
